# Supplementary material for: Iridium complexes of chiral diamines containing carbon and nitrogen stereocentres: synthesis, structure and evaluation as transfer hydrogenation catalysts
Source: Royal Society of Chemistry journal article supplement (doi:10.1039/b812699b), 2008-11-24
Supplement: b812699b.pdf [file b812699b.pdf]

## SUPPORTING INFORMATION

# Iridium complexes of chiral diamines containing carbon and nitrogen stereocentres: synthesis, structure and evaluation as transfer hydrogenation catalysts

José A. Fuentes,<sup>\*a</sup> Marcia B. France,<sup>b</sup> Alexandra M. Z. Slawin,<sup>a</sup> and Matthew L. Clarke<sup>a</sup>

<sup>a</sup> School of Chemistry, University of St. Andrews, EaSTCHEM, St. Andrews, Fife (UK), KY16 9ST. Fax: +44 (0)1334 463808; Tel: +44 (0)1334 463859; E-mail: jaf14@st-andrews.ac.uk

<sup>b</sup> Department of Chemistry, Washington and Lee University, Lexington, VA 24450, (USA). Fax: 1-540-458-8878; Tel: 1-540-458-8879; E-mail: francem@wlu.edu

### Crystallographic data of complex 4 (mfmc1)

Table 1. Crystal data and structure refinement for mfmc1.

|                                   |                                             |                       |
|-----------------------------------|---------------------------------------------|-----------------------|
| Identification code               | mfmc1                                       |                       |
| Empirical formula                 | C36 H51 B Cl7 F4 Ir N2                      |                       |
| Formula weight                    | 1038.95                                     |                       |
| Temperature                       | 93(2) K                                     |                       |
| Wavelength                        | 0.71073 Å                                   |                       |
| Crystal system                    | Orthorhombic                                |                       |
| Space group                       | P2(1)2(1)2(1)                               |                       |
| Unit cell dimensions              | a = 13.5451(7) Å                            | $\alpha = 90^\circ$ . |
|                                   | b = 17.3548(10) Å                           | $\beta = 90^\circ$ .  |
|                                   | c = 18.4163(10) Å                           | $\gamma = 90^\circ$ . |
| Volume                            | 4329.2(4) Å <sup>3</sup>                    |                       |
| Z                                 | 4                                           |                       |
| Density (calculated)              | 1.594 Mg/m <sup>3</sup>                     |                       |
| Absorption coefficient            | 3.561 mm <sup>-1</sup>                      |                       |
| F(000)                            | 2072                                        |                       |
| Crystal size                      | 0.1000 x 0.1000 x 0.1000 mm <sup>3</sup>    |                       |
| Theta range for data collection   | 1.87 to 25.36°.                             |                       |
| Index ranges                      | -16<=h<=14, -20<=k<=19, -22<=l<=18          |                       |
| Reflections collected             | 28479                                       |                       |
| Independent reflections           | 7939 [R(int) = 0.0423]                      |                       |
| Completeness to theta = 25.00°    | 100.0 %                                     |                       |
| Absorption correction             | Multiscan                                   |                       |
| Max. and min. transmission        | 1.0000 and 0.7678                           |                       |
| Refinement method                 | Full-matrix least-squares on F <sup>2</sup> |                       |
| Data / restraints / parameters    | 7939 / 2 / 474                              |                       |
| Goodness-of-fit on F <sup>2</sup> | 1.070                                       |                       |
| Final R indices [I>2sigma(I)]     | R1 = 0.0290, wR2 = 0.0570                   |                       |
| R indices (all data)              | R1 = 0.0306, wR2 = 0.0578                   |                       |
| Absolute structure parameter      | -0.011(4)                                   |                       |
| Largest diff. peak and hole       | 1.234 and -0.548 e.Å <sup>-3</sup>          |                       |

Table 2. Atomic coordinates ( $\times 10^4$ ) and equivalent isotropic displacement parameters ( $\text{\AA}^2 \times 10^3$ ) for *mfmc1*.  $U(\text{eq})$  is defined as one third of the trace of the orthogonalized  $U^{ij}$  tensor.

|       | x       | y        | z       | U(eq)  |
|-------|---------|----------|---------|--------|
| Ir(1) | 2967(1) | 6458(1)  | 725(1)  | 15(1)  |
| Cl(1) | 4269(1) | 7181(1)  | 139(1)  | 22(1)  |
| N(1)  | 3714(2) | 6472(2)  | 1773(2) | 14(1)  |
| C(1)  | 3960(3) | 7291(2)  | 1986(2) | 17(1)  |
| C(2)  | 3007(4) | 7754(2)  | 1872(2) | 16(1)  |
| N(2)  | 2648(3) | 7632(2)  | 1108(2) | 19(1)  |
| C(3)  | 3208(3) | 8597(2)  | 2045(2) | 21(1)  |
| C(4)  | 3543(4) | 8706(2)  | 2834(2) | 24(1)  |
| C(5)  | 4468(4) | 8215(3)  | 2990(3) | 26(1)  |
| C(6)  | 4296(4) | 7373(2)  | 2770(3) | 21(1)  |
| C(7)  | 4526(3) | 5880(3)  | 1869(2) | 19(1)  |
| C(8)  | 4682(3) | 5660(2)  | 2663(2) | 19(1)  |
| C(9)  | 3893(4) | 5514(2)  | 3127(3) | 22(1)  |
| C(10) | 4037(4) | 5327(3)  | 3842(3) | 28(1)  |
| C(11) | 4982(4) | 5249(3)  | 4115(3) | 32(1)  |
| C(12) | 5777(4) | 5363(3)  | 3667(3) | 30(1)  |
| C(13) | 5633(4) | 5579(3)  | 2947(3) | 26(1)  |
| C(14) | 5467(4) | 6113(3)  | 1466(3) | 32(1)  |
| C(15) | 1630(3) | 7978(3)  | 952(2)  | 18(1)  |
| C(16) | 1730(3) | 8808(2)  | 682(3)  | 19(1)  |
| C(17) | 1196(3) | 9415(3)  | 996(3)  | 22(1)  |
| C(18) | 1289(3) | 10156(3) | 731(3)  | 28(1)  |
| C(19) | 1916(4) | 10309(3) | 158(3)  | 32(1)  |
| C(20) | 2432(4) | 9713(3)  | -171(3) | 30(1)  |
| C(21) | 2336(4) | 8966(3)  | 88(3)   | 26(1)  |
| C(22) | 925(3)  | 7868(3)  | 1590(2) | 22(1)  |
| C(23) | 2701(4) | 8537(3)  | 3362(3) | 38(1)  |
| C(24) | 5387(4) | 8535(3)  | 2653(3) | 34(1)  |
| C(25) | 2250(3) | 5338(2)  | 852(2)  | 19(1)  |
| C(26) | 1551(3) | 5884(2)  | 577(2)  | 19(1)  |
| C(27) | 1915(3) | 6164(2)  | -113(2) | 19(1)  |
| C(28) | 2820(3) | 5771(2)  | -261(2) | 19(1)  |
| C(29) | 3052(4) | 5274(2)  | 330(2)  | 20(1)  |
| C(30) | 2139(4) | 4858(3)  | 1519(2) | 27(1)  |
| C(31) | 553(3)  | 6045(3)  | 904(3)  | 24(1)  |
| C(32) | 1376(3) | 6677(3)  | -650(3) | 25(1)  |
| C(33) | 3411(4) | 5841(3)  | -941(2) | 27(1)  |
| C(34) | 3886(4) | 4719(3)  | 352(3)  | 26(1)  |
| B(1)  | 1133(4) | 6261(3)  | 3161(3) | 29(1)  |
| F(1)  | 526(2)  | 6904(2)  | 3190(2) | 45(1)  |
| F(2)  | 1646(3) | 6179(2)  | 3801(2) | 60(1)  |
| F(3)  | 1801(2) | 6351(2)  | 2594(1) | 31(1)  |
| F(4)  | 566(2)  | 5619(2)  | 3023(2) | 55(1)  |
| C(35) | 5123(7) | 7157(4)  | 5414(4) | 77(2)  |
| Cl(2) | 3958(2) | 7282(2)  | 5011(1) | 126(1) |
| Cl(3) | 5168(2) | 6301(1)  | 5877(1) | 77(1)  |
| Cl(4) | 6058(2) | 7213(1)  | 4745(1) | 98(1)  |
| C(36) | 8515(4) | 6475(3)  | 2420(3) | 41(1)  |
| Cl(5) | 7769(1) | 6847(1)  | 3128(1) | 56(1)  |
| Cl(6) | 8358(1) | 6990(1)  | 1619(1) | 47(1)  |
| Cl(7) | 8249(1) | 5493(1)  | 2264(1) | 47(1)  |

Table 3. Bond lengths [ $\text{\AA}$ ] and angles [ $^\circ$ ] for *mfmc1*.

---

|              |            |
|--------------|------------|
| Ir(1)-C(27)  | 2.161(4)   |
| Ir(1)-C(26)  | 2.179(4)   |
| Ir(1)-N(1)   | 2.179(3)   |
| Ir(1)-C(28)  | 2.182(4)   |
| Ir(1)-C(29)  | 2.182(4)   |
| Ir(1)-C(25)  | 2.185(4)   |
| Ir(1)-N(2)   | 2.199(4)   |
| Ir(1)-Cl(1)  | 2.4187(11) |
| N(1)-C(1)    | 1.512(5)   |
| N(1)-C(7)    | 1.515(5)   |
| N(1)-H(1N)   | 0.978(5)   |
| C(1)-C(6)    | 1.522(6)   |
| C(1)-C(2)    | 1.534(6)   |
| C(1)-H(1A)   | 1.0000     |
| C(2)-N(2)    | 1.504(5)   |
| C(2)-C(3)    | 1.521(6)   |
| C(2)-H(2A)   | 1.0000     |
| N(2)-C(15)   | 1.532(5)   |
| N(2)-H(2N)   | 0.978(5)   |
| C(3)-C(4)    | 1.535(6)   |
| C(3)-H(3A)   | 0.9900     |
| C(3)-H(3B)   | 0.9900     |
| C(4)-C(23)   | 1.527(7)   |
| C(4)-C(5)    | 1.541(7)   |
| C(4)-H(4A)   | 1.0000     |
| C(5)-C(24)   | 1.497(7)   |
| C(5)-C(6)    | 1.534(6)   |
| C(5)-H(5A)   | 1.0000     |
| C(6)-H(6A)   | 0.9900     |
| C(6)-H(6B)   | 0.9900     |
| C(7)-C(8)    | 1.525(6)   |
| C(7)-C(14)   | 1.529(7)   |
| C(7)-H(7A)   | 1.0000     |
| C(8)-C(9)    | 1.392(6)   |
| C(8)-C(13)   | 1.398(7)   |
| C(9)-C(10)   | 1.370(6)   |
| C(9)-H(9A)   | 0.9500     |
| C(10)-C(11)  | 1.383(7)   |
| C(10)-H(10A) | 0.9500     |
| C(11)-C(12)  | 1.371(7)   |
| C(11)-H(11A) | 0.9500     |
| C(12)-C(13)  | 1.391(7)   |
| C(12)-H(12A) | 0.9500     |
| C(13)-H(13A) | 0.9500     |
| C(14)-H(14A) | 0.9800     |
| C(14)-H(14B) | 0.9800     |
| C(14)-H(14C) | 0.9800     |
| C(15)-C(22)  | 1.527(6)   |
| C(15)-C(16)  | 1.529(6)   |
| C(15)-H(15A) | 1.0000     |
| C(16)-C(21)  | 1.394(6)   |
| C(16)-C(17)  | 1.402(6)   |
| C(17)-C(18)  | 1.383(6)   |
| C(17)-H(17A) | 0.9500     |
| C(18)-C(19)  | 1.379(7)   |
| C(18)-H(18A) | 0.9500     |
| C(19)-C(20)  | 1.388(7)   |
| C(19)-H(19A) | 0.9500     |

|                   |            |
|-------------------|------------|
| C(20)-C(21)       | 1.387(7)   |
| C(20)-H(20A)      | 0.9500     |
| C(21)-H(21A)      | 0.9500     |
| C(22)-H(22A)      | 0.9800     |
| C(22)-H(22B)      | 0.9800     |
| C(22)-H(22C)      | 0.9800     |
| C(23)-H(23A)      | 0.9800     |
| C(23)-H(23B)      | 0.9800     |
| C(23)-H(23C)      | 0.9800     |
| C(24)-H(24A)      | 0.9800     |
| C(24)-H(24B)      | 0.9800     |
| C(24)-H(24C)      | 0.9800     |
| C(25)-C(26)       | 1.432(6)   |
| C(25)-C(29)       | 1.455(6)   |
| C(25)-C(30)       | 1.492(6)   |
| C(26)-C(27)       | 1.447(6)   |
| C(26)-C(31)       | 1.506(6)   |
| C(27)-C(28)       | 1.429(6)   |
| C(27)-C(32)       | 1.518(6)   |
| C(28)-C(29)       | 1.424(6)   |
| C(28)-C(33)       | 1.491(6)   |
| C(29)-C(34)       | 1.485(6)   |
| C(30)-H(30A)      | 0.9800     |
| C(30)-H(30B)      | 0.9800     |
| C(30)-H(30C)      | 0.9800     |
| C(31)-H(31A)      | 0.9800     |
| C(31)-H(31B)      | 0.9800     |
| C(31)-H(31C)      | 0.9800     |
| C(32)-H(32A)      | 0.9800     |
| C(32)-H(32B)      | 0.9800     |
| C(32)-H(32C)      | 0.9800     |
| C(33)-H(33A)      | 0.9800     |
| C(33)-H(33B)      | 0.9800     |
| C(33)-H(33C)      | 0.9800     |
| C(34)-H(34A)      | 0.9800     |
| C(34)-H(34B)      | 0.9800     |
| C(34)-H(34C)      | 0.9800     |
| B(1)-F(4)         | 1.377(7)   |
| B(1)-F(2)         | 1.376(7)   |
| B(1)-F(1)         | 1.387(6)   |
| B(1)-F(3)         | 1.389(6)   |
| C(35)-Cl(3)       | 1.713(7)   |
| C(35)-Cl(2)       | 1.757(9)   |
| C(35)-Cl(4)       | 1.771(9)   |
| C(35)-H(35A)      | 1.0000     |
| C(36)-Cl(6)       | 1.738(6)   |
| C(36)-Cl(7)       | 1.764(6)   |
| C(36)-Cl(5)       | 1.772(6)   |
| C(36)-H(36A)      | 1.0000     |
| C(27)-Ir(1)-C(26) | 38.96(17)  |
| C(27)-Ir(1)-N(1)  | 160.22(14) |
| C(26)-Ir(1)-N(1)  | 121.64(15) |
| C(27)-Ir(1)-C(28) | 38.41(16)  |
| C(26)-Ir(1)-C(28) | 64.23(16)  |
| N(1)-Ir(1)-C(28)  | 141.79(15) |
| C(27)-Ir(1)-C(29) | 64.84(16)  |
| C(26)-Ir(1)-C(29) | 64.81(17)  |
| N(1)-Ir(1)-C(29)  | 106.32(15) |
| C(28)-Ir(1)-C(29) | 38.08(16)  |

|                   |            |
|-------------------|------------|
| C(27)-Ir(1)-C(25) | 64.76(16)  |
| C(26)-Ir(1)-C(25) | 38.31(16)  |
| N(1)-Ir(1)-C(25)  | 96.97(15)  |
| C(28)-Ir(1)-C(25) | 64.03(16)  |
| C(29)-Ir(1)-C(25) | 38.92(16)  |
| C(27)-Ir(1)-N(2)  | 108.55(14) |
| C(26)-Ir(1)-N(2)  | 106.92(15) |
| N(1)-Ir(1)-N(2)   | 78.27(13)  |
| C(28)-Ir(1)-N(2)  | 139.07(15) |
| C(29)-Ir(1)-N(2)  | 171.71(16) |
| C(25)-Ir(1)-N(2)  | 134.63(14) |
| C(27)-Ir(1)-Cl(1) | 106.53(12) |
| C(26)-Ir(1)-Cl(1) | 145.44(12) |
| N(1)-Ir(1)-Cl(1)  | 92.92(9)   |
| C(28)-Ir(1)-Cl(1) | 88.80(12)  |
| C(29)-Ir(1)-Cl(1) | 107.52(13) |
| C(25)-Ir(1)-Cl(1) | 146.43(11) |
| N(2)-Ir(1)-Cl(1)  | 78.79(10)  |
| C(1)-N(1)-C(7)    | 116.5(3)   |
| C(1)-N(1)-Ir(1)   | 110.0(2)   |
| C(7)-N(1)-Ir(1)   | 115.7(2)   |
| C(1)-N(1)-H(1N)   | 106(2)     |
| C(7)-N(1)-H(1N)   | 104(2)     |
| Ir(1)-N(1)-H(1N)  | 103(2)     |
| N(1)-C(1)-C(6)    | 113.5(3)   |
| N(1)-C(1)-C(2)    | 105.8(3)   |
| C(6)-C(1)-C(2)    | 109.4(4)   |
| N(1)-C(1)-H(1A)   | 109.3      |
| C(6)-C(1)-H(1A)   | 109.3      |
| C(2)-C(1)-H(1A)   | 109.3      |
| N(2)-C(2)-C(3)    | 112.9(3)   |
| N(2)-C(2)-C(1)    | 109.1(3)   |
| C(3)-C(2)-C(1)    | 109.0(4)   |
| N(2)-C(2)-H(2A)   | 108.6      |
| C(3)-C(2)-H(2A)   | 108.6      |
| C(1)-C(2)-H(2A)   | 108.6      |
| C(2)-N(2)-C(15)   | 114.4(3)   |
| C(2)-N(2)-Ir(1)   | 111.5(3)   |
| C(15)-N(2)-Ir(1)  | 118.7(3)   |
| C(2)-N(2)-H(2N)   | 108(3)     |
| C(15)-N(2)-H(2N)  | 108(3)     |
| Ir(1)-N(2)-H(2N)  | 95(3)      |
| C(2)-C(3)-C(4)    | 111.7(4)   |
| C(2)-C(3)-H(3A)   | 109.3      |
| C(4)-C(3)-H(3A)   | 109.3      |
| C(2)-C(3)-H(3B)   | 109.3      |
| C(4)-C(3)-H(3B)   | 109.3      |
| H(3A)-C(3)-H(3B)  | 108.0      |
| C(23)-C(4)-C(3)   | 111.0(4)   |
| C(23)-C(4)-C(5)   | 112.5(4)   |
| C(3)-C(4)-C(5)    | 110.4(4)   |
| C(23)-C(4)-H(4A)  | 107.6      |
| C(3)-C(4)-H(4A)   | 107.6      |
| C(5)-C(4)-H(4A)   | 107.6      |
| C(24)-C(5)-C(6)   | 111.7(4)   |
| C(24)-C(5)-C(4)   | 113.2(4)   |
| C(6)-C(5)-C(4)    | 110.7(4)   |
| C(24)-C(5)-H(5A)  | 106.9      |
| C(6)-C(5)-H(5A)   | 106.9      |
| C(4)-C(5)-H(5A)   | 106.9      |

|                     |          |
|---------------------|----------|
| C(1)-C(6)-C(5)      | 112.6(4) |
| C(1)-C(6)-H(6A)     | 109.1    |
| C(5)-C(6)-H(6A)     | 109.1    |
| C(1)-C(6)-H(6B)     | 109.1    |
| C(5)-C(6)-H(6B)     | 109.1    |
| H(6A)-C(6)-H(6B)    | 107.8    |
| N(1)-C(7)-C(8)      | 112.5(3) |
| N(1)-C(7)-C(14)     | 111.7(4) |
| C(8)-C(7)-C(14)     | 114.6(4) |
| N(1)-C(7)-H(7A)     | 105.7    |
| C(8)-C(7)-H(7A)     | 105.7    |
| C(14)-C(7)-H(7A)    | 105.7    |
| C(9)-C(8)-C(13)     | 117.3(4) |
| C(9)-C(8)-C(7)      | 121.8(4) |
| C(13)-C(8)-C(7)     | 120.8(4) |
| C(10)-C(9)-C(8)     | 121.6(5) |
| C(10)-C(9)-H(9A)    | 119.2    |
| C(8)-C(9)-H(9A)     | 119.2    |
| C(9)-C(10)-C(11)    | 120.4(5) |
| C(9)-C(10)-H(10A)   | 119.8    |
| C(11)-C(10)-H(10A)  | 119.8    |
| C(12)-C(11)-C(10)   | 119.6(5) |
| C(12)-C(11)-H(11A)  | 120.2    |
| C(10)-C(11)-H(11A)  | 120.2    |
| C(11)-C(12)-C(13)   | 120.1(5) |
| C(11)-C(12)-H(12A)  | 119.9    |
| C(13)-C(12)-H(12A)  | 119.9    |
| C(12)-C(13)-C(8)    | 120.9(5) |
| C(12)-C(13)-H(13A)  | 119.5    |
| C(8)-C(13)-H(13A)   | 119.5    |
| C(7)-C(14)-H(14A)   | 109.5    |
| C(7)-C(14)-H(14B)   | 109.5    |
| H(14A)-C(14)-H(14B) | 109.5    |
| C(7)-C(14)-H(14C)   | 109.5    |
| H(14A)-C(14)-H(14C) | 109.5    |
| H(14B)-C(14)-H(14C) | 109.5    |
| C(22)-C(15)-C(16)   | 115.1(4) |
| C(22)-C(15)-N(2)    | 111.7(4) |
| C(16)-C(15)-N(2)    | 110.5(3) |
| C(22)-C(15)-H(15A)  | 106.3    |
| C(16)-C(15)-H(15A)  | 106.3    |
| N(2)-C(15)-H(15A)   | 106.3    |
| C(21)-C(16)-C(17)   | 118.7(4) |
| C(21)-C(16)-C(15)   | 119.5(4) |
| C(17)-C(16)-C(15)   | 121.8(4) |
| C(18)-C(17)-C(16)   | 120.4(5) |
| C(18)-C(17)-H(17A)  | 119.8    |
| C(16)-C(17)-H(17A)  | 119.8    |
| C(19)-C(18)-C(17)   | 120.3(5) |
| C(19)-C(18)-H(18A)  | 119.8    |
| C(17)-C(18)-H(18A)  | 119.8    |
| C(18)-C(19)-C(20)   | 120.1(4) |
| C(18)-C(19)-H(19A)  | 120.0    |
| C(20)-C(19)-H(19A)  | 120.0    |
| C(21)-C(20)-C(19)   | 119.9(5) |
| C(21)-C(20)-H(20A)  | 120.1    |
| C(19)-C(20)-H(20A)  | 120.1    |
| C(20)-C(21)-C(16)   | 120.6(5) |
| C(20)-C(21)-H(21A)  | 119.7    |
| C(16)-C(21)-H(21A)  | 119.7    |

|                     |          |
|---------------------|----------|
| C(15)-C(22)-H(22A)  | 109.5    |
| C(15)-C(22)-H(22B)  | 109.5    |
| H(22A)-C(22)-H(22B) | 109.5    |
| C(15)-C(22)-H(22C)  | 109.5    |
| H(22A)-C(22)-H(22C) | 109.5    |
| H(22B)-C(22)-H(22C) | 109.5    |
| C(4)-C(23)-H(23A)   | 109.5    |
| C(4)-C(23)-H(23B)   | 109.5    |
| H(23A)-C(23)-H(23B) | 109.5    |
| C(4)-C(23)-H(23C)   | 109.5    |
| H(23A)-C(23)-H(23C) | 109.5    |
| H(23B)-C(23)-H(23C) | 109.5    |
| C(5)-C(24)-H(24A)   | 109.5    |
| C(5)-C(24)-H(24B)   | 109.5    |
| H(24A)-C(24)-H(24B) | 109.5    |
| C(5)-C(24)-H(24C)   | 109.5    |
| H(24A)-C(24)-H(24C) | 109.5    |
| H(24B)-C(24)-H(24C) | 109.5    |
| C(26)-C(25)-C(29)   | 108.1(4) |
| C(26)-C(25)-C(30)   | 126.5(4) |
| C(29)-C(25)-C(30)   | 125.2(4) |
| C(26)-C(25)-Ir(1)   | 70.6(2)  |
| C(29)-C(25)-Ir(1)   | 70.4(2)  |
| C(30)-C(25)-Ir(1)   | 129.0(3) |
| C(25)-C(26)-C(27)   | 107.9(4) |
| C(25)-C(26)-C(31)   | 125.1(4) |
| C(27)-C(26)-C(31)   | 126.5(4) |
| C(25)-C(26)-Ir(1)   | 71.1(2)  |
| C(27)-C(26)-Ir(1)   | 69.9(2)  |
| C(31)-C(26)-Ir(1)   | 130.9(3) |
| C(28)-C(27)-C(26)   | 107.4(4) |
| C(28)-C(27)-C(32)   | 124.7(4) |
| C(26)-C(27)-C(32)   | 127.2(4) |
| C(28)-C(27)-Ir(1)   | 71.6(2)  |
| C(26)-C(27)-Ir(1)   | 71.2(2)  |
| C(32)-C(27)-Ir(1)   | 130.1(3) |
| C(29)-C(28)-C(27)   | 109.5(4) |
| C(29)-C(28)-C(33)   | 124.9(4) |
| C(27)-C(28)-C(33)   | 125.6(4) |
| C(29)-C(28)-Ir(1)   | 71.0(2)  |
| C(27)-C(28)-Ir(1)   | 70.0(2)  |
| C(33)-C(28)-Ir(1)   | 127.2(3) |
| C(28)-C(29)-C(25)   | 107.1(4) |
| C(28)-C(29)-C(34)   | 125.6(4) |
| C(25)-C(29)-C(34)   | 126.8(4) |
| C(28)-C(29)-Ir(1)   | 70.9(2)  |
| C(25)-C(29)-Ir(1)   | 70.7(2)  |
| C(34)-C(29)-Ir(1)   | 130.0(3) |
| C(25)-C(30)-H(30A)  | 109.5    |
| C(25)-C(30)-H(30B)  | 109.5    |
| H(30A)-C(30)-H(30B) | 109.5    |
| C(25)-C(30)-H(30C)  | 109.5    |
| H(30A)-C(30)-H(30C) | 109.5    |
| H(30B)-C(30)-H(30C) | 109.5    |
| C(26)-C(31)-H(31A)  | 109.5    |
| C(26)-C(31)-H(31B)  | 109.5    |
| H(31A)-C(31)-H(31B) | 109.5    |
| C(26)-C(31)-H(31C)  | 109.5    |
| H(31A)-C(31)-H(31C) | 109.5    |
| H(31B)-C(31)-H(31C) | 109.5    |

|                     |          |
|---------------------|----------|
| C(27)-C(32)-H(32A)  | 109.5    |
| C(27)-C(32)-H(32B)  | 109.5    |
| H(32A)-C(32)-H(32B) | 109.5    |
| C(27)-C(32)-H(32C)  | 109.5    |
| H(32A)-C(32)-H(32C) | 109.5    |
| H(32B)-C(32)-H(32C) | 109.5    |
| C(28)-C(33)-H(33A)  | 109.5    |
| C(28)-C(33)-H(33B)  | 109.5    |
| H(33A)-C(33)-H(33B) | 109.5    |
| C(28)-C(33)-H(33C)  | 109.5    |
| H(33A)-C(33)-H(33C) | 109.5    |
| H(33B)-C(33)-H(33C) | 109.5    |
| C(29)-C(34)-H(34A)  | 109.5    |
| C(29)-C(34)-H(34B)  | 109.5    |
| H(34A)-C(34)-H(34B) | 109.5    |
| C(29)-C(34)-H(34C)  | 109.5    |
| H(34A)-C(34)-H(34C) | 109.5    |
| H(34B)-C(34)-H(34C) | 109.5    |
| F(4)-B(1)-F(2)      | 110.9(5) |
| F(4)-B(1)-F(1)      | 109.1(5) |
| F(2)-B(1)-F(1)      | 110.4(4) |
| F(4)-B(1)-F(3)      | 108.4(4) |
| F(2)-B(1)-F(3)      | 109.1(4) |
| F(1)-B(1)-F(3)      | 108.9(4) |
| Cl(3)-C(35)-Cl(2)   | 110.4(5) |
| Cl(3)-C(35)-Cl(4)   | 111.6(5) |
| Cl(2)-C(35)-Cl(4)   | 109.9(4) |
| Cl(3)-C(35)-H(35A)  | 108.2    |
| Cl(2)-C(35)-H(35A)  | 108.2    |
| Cl(4)-C(35)-H(35A)  | 108.2    |
| Cl(6)-C(36)-Cl(7)   | 109.5(3) |
| Cl(6)-C(36)-Cl(5)   | 111.6(3) |
| Cl(7)-C(36)-Cl(5)   | 110.8(3) |
| Cl(6)-C(36)-H(36A)  | 108.3    |
| Cl(7)-C(36)-H(36A)  | 108.3    |
| Cl(5)-C(36)-H(36A)  | 108.3    |

---

Symmetry transformations used to generate equivalent atoms:

Table 4. Anisotropic displacement parameters ( $\text{\AA}^2 \times 10^3$ ) for mfmc1. The anisotropic displacement factor exponent takes the form:  $-2\pi^2 [ h^2 a^{*2} U^{11} + \dots + 2 h k a^* b^* U^{12} ]$

|       | U <sup>11</sup> | U <sup>22</sup> | U <sup>33</sup> | U <sup>23</sup> | U <sup>13</sup> | U <sup>12</sup> |
|-------|-----------------|-----------------|-----------------|-----------------|-----------------|-----------------|
| Ir(1) | 16(1)           | 15(1)           | 13(1)           | -2(1)           | 0(1)            | -2(1)           |
| Cl(1) | 22(1)           | 27(1)           | 18(1)           | 0(1)            | 4(1)            | -7(1)           |
| N(1)  | 15(2)           | 12(2)           | 16(2)           | 0(2)            | 0(1)            | -2(2)           |
| C(1)  | 23(2)           | 13(2)           | 14(2)           | 1(2)            | -1(2)           | -1(2)           |
| C(2)  | 21(2)           | 21(2)           | 7(2)            | 2(2)            | -2(2)           | 4(2)            |
| N(2)  | 27(2)           | 15(2)           | 15(2)           | -1(2)           | -4(2)           | 0(2)            |
| C(3)  | 30(3)           | 11(2)           | 22(2)           | -4(2)           | -3(2)           | 0(2)            |
| C(4)  | 41(3)           | 12(2)           | 20(2)           | -3(2)           | -5(2)           | -4(2)           |
| C(5)  | 37(3)           | 19(2)           | 21(3)           | -6(2)           | -5(2)           | -8(2)           |
| C(6)  | 28(3)           | 18(2)           | 17(3)           | 4(2)            | -5(2)           | -5(2)           |
| C(7)  | 21(2)           | 19(2)           | 18(3)           | -1(2)           | -4(2)           | 4(2)            |
| C(8)  | 27(3)           | 8(2)            | 23(3)           | -2(2)           | -6(2)           | 1(2)            |
| C(9)  | 19(2)           | 14(2)           | 34(3)           | 3(2)            | -4(2)           | 0(2)            |
| C(10) | 40(3)           | 20(2)           | 24(3)           | 6(2)            | 2(2)            | -6(2)           |
| C(11) | 51(4)           | 21(3)           | 23(3)           | 5(2)            | -10(3)          | -6(2)           |
| C(12) | 33(3)           | 24(3)           | 33(3)           | 1(2)            | -17(3)          | 3(2)            |
| C(13) | 29(3)           | 22(2)           | 26(3)           | -1(2)           | -4(2)           | 2(2)            |
| C(14) | 21(3)           | 48(3)           | 26(3)           | 4(3)            | 5(2)            | 7(2)            |
| C(15) | 20(2)           | 20(2)           | 14(2)           | -3(2)           | -2(2)           | 7(2)            |
| C(16) | 23(2)           | 17(2)           | 16(2)           | 4(2)            | -10(2)          | -1(2)           |
| C(17) | 26(3)           | 16(2)           | 26(3)           | 1(2)            | -5(2)           | -1(2)           |
| C(18) | 33(3)           | 28(3)           | 25(3)           | -5(3)           | -9(3)           | 0(2)            |
| C(19) | 47(3)           | 22(3)           | 28(3)           | 4(2)            | -15(3)          | -1(3)           |
| C(20) | 38(3)           | 36(3)           | 16(3)           | 6(2)            | -4(2)           | -4(2)           |
| C(21) | 35(3)           | 24(3)           | 20(3)           | 2(2)            | -6(2)           | 0(2)            |
| C(22) | 23(3)           | 22(2)           | 22(3)           | 0(2)            | -2(2)           | 1(2)            |
| C(23) | 54(4)           | 41(3)           | 21(3)           | -8(3)           | -4(2)           | 2(3)            |
| C(24) | 35(3)           | 34(3)           | 32(3)           | 0(3)            | -8(2)           | -13(3)          |
| C(25) | 24(3)           | 15(2)           | 17(2)           | -9(2)           | 1(2)            | -8(2)           |
| C(26) | 17(2)           | 16(2)           | 23(3)           | -9(2)           | 3(2)            | -5(2)           |
| C(27) | 17(2)           | 20(2)           | 20(2)           | -6(2)           | -6(2)           | 0(2)            |
| C(28) | 22(3)           | 20(2)           | 15(2)           | -9(2)           | -3(2)           | -3(2)           |
| C(29) | 22(2)           | 18(2)           | 18(2)           | -8(2)           | -5(2)           | 1(2)            |
| C(30) | 34(3)           | 22(2)           | 24(3)           | 3(2)            | 1(2)            | -10(2)          |
| C(31) | 17(2)           | 24(2)           | 31(3)           | -8(2)           | 5(2)            | -6(2)           |
| C(32) | 23(2)           | 28(3)           | 23(3)           | -2(2)           | -4(2)           | 4(2)            |
| C(33) | 28(3)           | 33(3)           | 19(3)           | -6(2)           | 5(2)            | 3(2)            |
| C(34) | 26(3)           | 26(3)           | 26(3)           | -8(2)           | -1(2)           | 6(2)            |
| B(1)  | 30(3)           | 36(4)           | 21(3)           | 4(3)            | 5(3)            | 4(3)            |
| F(1)  | 43(2)           | 46(2)           | 45(2)           | -9(2)           | 4(2)            | 16(2)           |
| F(2)  | 59(2)           | 95(3)           | 26(2)           | 20(2)           | -5(2)           | 9(2)            |
| F(3)  | 26(2)           | 40(2)           | 26(1)           | 11(1)           | 9(1)            | 5(1)            |
| F(4)  | 43(2)           | 44(2)           | 78(3)           | 12(2)           | 7(2)            | -20(2)          |
| C(35) | 129(7)          | 58(5)           | 43(4)           | -6(4)           | -10(5)          | 10(5)           |
| Cl(2) | 136(2)          | 176(3)          | 68(2)           | -3(2)           | -10(2)          | 82(2)           |
| Cl(3) | 88(1)           | 70(1)           | 73(1)           | 1(1)            | -24(1)          | -10(1)          |
| Cl(4) | 127(2)          | 81(1)           | 85(2)           | -17(1)          | 13(2)           | -29(2)          |
| C(36) | 36(3)           | 42(3)           | 45(3)           | 6(3)            | 6(2)            | -3(3)           |
| Cl(5) | 67(1)           | 47(1)           | 55(1)           | -5(1)           | 14(1)           | -2(1)           |
| Cl(6) | 50(1)           | 48(1)           | 44(1)           | 10(1)           | -9(1)           | -6(1)           |
| Cl(7) | 49(1)           | 40(1)           | 51(1)           | 4(1)            | 4(1)            | 0(1)            |

Table 5. Hydrogen coordinates ( $\times 10^4$ ) and isotropic displacement parameters ( $\text{\AA}^2 \times 10^{-3}$ ) for mfmc1.

|        | x        | y        | z        | U(eq)  |
|--------|----------|----------|----------|--------|
| H(1N)  | 3200(20) | 6300(20) | 2107(16) | 14(11) |
| H(1A)  | 4485     | 7495     | 1656     | 20     |
| H(2A)  | 2494     | 7558     | 2216     | 20     |
| H(2N)  | 3120(30) | 7880(30) | 780(20)  | 43(15) |
| H(3A)  | 2600     | 8901     | 1960     | 25     |
| H(3B)  | 3726     | 8794     | 1714     | 25     |
| H(4A)  | 3732     | 9259     | 2896     | 29     |
| H(5A)  | 4570     | 8221     | 3527     | 31     |
| H(6A)  | 4916     | 7080     | 2839     | 25     |
| H(6B)  | 3790     | 7145     | 3094     | 25     |
| H(7A)  | 4284     | 5403     | 1623     | 23     |
| H(9A)  | 3238     | 5546     | 2944     | 27     |
| H(10A) | 3484     | 5250     | 4151     | 34     |
| H(11A) | 5081     | 5117     | 4611     | 38     |
| H(12A) | 6428     | 5294     | 3849     | 36     |
| H(13A) | 6189     | 5672     | 2645     | 31     |
| H(14A) | 5974     | 5717     | 1538     | 48     |
| H(14B) | 5706     | 6607     | 1655     | 48     |
| H(14C) | 5323     | 6164     | 947      | 48     |
| H(15A) | 1348     | 7676     | 538      | 22     |
| H(17A) | 768      | 9315     | 1394     | 27     |
| H(18A) | 920      | 10563    | 944      | 34     |
| H(19A) | 1994     | 10822    | -11      | 39     |
| H(20A) | 2850     | 9816     | -574     | 36     |
| H(21A) | 2687     | 8559     | -140     | 32     |
| H(22A) | 904      | 7322     | 1724     | 33     |
| H(22B) | 262      | 8039     | 1450     | 33     |
| H(22C) | 1156     | 8172     | 2005     | 33     |
| H(23A) | 2131     | 8859     | 3240     | 58     |
| H(23B) | 2917     | 8651     | 3859     | 58     |
| H(23C) | 2516     | 7992     | 3326     | 58     |
| H(24A) | 5948     | 8203     | 2774     | 50     |
| H(24B) | 5507     | 9055     | 2840     | 50     |
| H(24C) | 5307     | 8555     | 2124     | 50     |
| H(30A) | 1879     | 4350     | 1386     | 40     |
| H(30B) | 1682     | 5111     | 1855     | 40     |
| H(30C) | 2784     | 4796     | 1753     | 40     |
| H(31A) | 88       | 5641     | 757      | 36     |
| H(31B) | 313      | 6546     | 732      | 36     |
| H(31C) | 607      | 6053     | 1434     | 36     |
| H(32A) | 1123     | 6363     | -1051    | 38     |
| H(32B) | 1832     | 7066     | -840     | 38     |
| H(32C) | 824      | 6933     | -405     | 38     |
| H(33A) | 3149     | 5487     | -1308    | 40     |
| H(33B) | 4101     | 5711     | -839     | 40     |
| H(33C) | 3371     | 6371     | -1122    | 40     |
| H(34A) | 3764     | 4302     | 5        | 39     |
| H(34B) | 3944     | 4503     | 842      | 39     |
| H(34C) | 4500     | 4984     | 224      | 39     |
| H(35A) | 5229     | 7585     | 5770     | 92     |
| H(36A) | 9222     | 6518     | 2571     | 49     |

Table 6. Torsion angles [°] for mfmc1.

|                        |           |
|------------------------|-----------|
| C(27)-Ir(1)-N(1)-C(1)  | -136.4(4) |
| C(26)-Ir(1)-N(1)-C(1)  | -126.6(3) |
| C(28)-Ir(1)-N(1)-C(1)  | 145.8(3)  |
| C(29)-Ir(1)-N(1)-C(1)  | 163.3(3)  |
| C(25)-Ir(1)-N(1)-C(1)  | -158.1(3) |
| N(2)-Ir(1)-N(1)-C(1)   | -23.8(3)  |
| Cl(1)-Ir(1)-N(1)-C(1)  | 54.1(3)   |
| C(27)-Ir(1)-N(1)-C(7)  | 89.0(5)   |
| C(26)-Ir(1)-N(1)-C(7)  | 98.8(3)   |
| C(28)-Ir(1)-N(1)-C(7)  | 11.2(4)   |
| C(29)-Ir(1)-N(1)-C(7)  | 28.7(3)   |
| C(25)-Ir(1)-N(1)-C(7)  | 67.3(3)   |
| N(2)-Ir(1)-N(1)-C(7)   | -158.5(3) |
| Cl(1)-Ir(1)-N(1)-C(7)  | -80.5(3)  |
| C(7)-N(1)-C(1)-C(6)    | -57.3(5)  |
| Ir(1)-N(1)-C(1)-C(6)   | 168.6(3)  |
| C(7)-N(1)-C(1)-C(2)    | -177.2(3) |
| Ir(1)-N(1)-C(1)-C(2)   | 48.6(3)   |
| N(1)-C(1)-C(2)-N(2)    | -54.0(4)  |
| C(6)-C(1)-C(2)-N(2)    | -176.6(3) |
| N(1)-C(1)-C(2)-C(3)    | -177.6(3) |
| C(6)-C(1)-C(2)-C(3)    | 59.8(4)   |
| C(3)-C(2)-N(2)-C(15)   | -66.3(5)  |
| C(1)-C(2)-N(2)-C(15)   | 172.4(3)  |
| C(3)-C(2)-N(2)-Ir(1)   | 155.6(3)  |
| C(1)-C(2)-N(2)-Ir(1)   | 34.3(4)   |
| C(27)-Ir(1)-N(2)-C(2)  | 154.8(3)  |
| C(26)-Ir(1)-N(2)-C(2)  | 113.8(3)  |
| N(1)-Ir(1)-N(2)-C(2)   | -5.9(3)   |
| C(28)-Ir(1)-N(2)-C(2)  | -176.2(3) |
| C(29)-Ir(1)-N(2)-C(2)  | 118.5(10) |
| C(25)-Ir(1)-N(2)-C(2)  | 82.3(4)   |
| Cl(1)-Ir(1)-N(2)-C(2)  | -101.3(3) |
| C(27)-Ir(1)-N(2)-C(15) | 18.7(3)   |
| C(26)-Ir(1)-N(2)-C(15) | -22.3(3)  |
| N(1)-Ir(1)-N(2)-C(15)  | -142.1(3) |
| C(28)-Ir(1)-N(2)-C(15) | 47.7(4)   |
| C(29)-Ir(1)-N(2)-C(15) | -17.6(12) |
| C(25)-Ir(1)-N(2)-C(15) | -53.8(4)  |
| Cl(1)-Ir(1)-N(2)-C(15) | 122.5(3)  |
| N(2)-C(2)-C(3)-C(4)    | 178.3(4)  |
| C(1)-C(2)-C(3)-C(4)    | -60.4(5)  |
| C(2)-C(3)-C(4)-C(23)   | -68.6(5)  |
| C(2)-C(3)-C(4)-C(5)    | 56.9(5)   |
| C(23)-C(4)-C(5)-C(24)  | -161.5(4) |
| C(3)-C(4)-C(5)-C(24)   | 73.9(5)   |
| C(23)-C(4)-C(5)-C(6)   | 72.2(5)   |
| C(3)-C(4)-C(5)-C(6)    | -52.4(5)  |
| N(1)-C(1)-C(6)-C(5)    | -175.8(4) |
| C(2)-C(1)-C(6)-C(5)    | -57.9(5)  |
| C(24)-C(5)-C(6)-C(1)   | -72.9(5)  |
| C(4)-C(5)-C(6)-C(1)    | 54.3(5)   |
| C(1)-N(1)-C(7)-C(8)    | 75.0(5)   |
| Ir(1)-N(1)-C(7)-C(8)   | -153.4(3) |
| C(1)-N(1)-C(7)-C(14)   | -55.5(5)  |
| Ir(1)-N(1)-C(7)-C(14)  | 76.1(4)   |
| N(1)-C(7)-C(8)-C(9)    | 44.0(6)   |
| C(14)-C(7)-C(8)-C(9)   | 173.0(4)  |

|                         |           |
|-------------------------|-----------|
| N(1)-C(7)-C(8)-C(13)    | -137.5(4) |
| C(14)-C(7)-C(8)-C(13)   | -8.5(6)   |
| C(13)-C(8)-C(9)-C(10)   | 2.4(7)    |
| C(7)-C(8)-C(9)-C(10)    | -179.1(4) |
| C(8)-C(9)-C(10)-C(11)   | -2.5(7)   |
| C(9)-C(10)-C(11)-C(12)  | 0.2(7)    |
| C(10)-C(11)-C(12)-C(13) | 2.0(7)    |
| C(11)-C(12)-C(13)-C(8)  | -2.0(7)   |
| C(9)-C(8)-C(13)-C(12)   | -0.2(7)   |
| C(7)-C(8)-C(13)-C(12)   | -178.7(4) |
| C(2)-N(2)-C(15)-C(22)   | -39.6(5)  |
| Ir(1)-N(2)-C(15)-C(22)  | 95.4(4)   |
| C(2)-N(2)-C(15)-C(16)   | 89.9(4)   |
| Ir(1)-N(2)-C(15)-C(16)  | -135.2(3) |
| C(22)-C(15)-C(16)-C(21) | -178.3(4) |
| N(2)-C(15)-C(16)-C(21)  | 54.1(5)   |
| C(22)-C(15)-C(16)-C(17) | -1.0(6)   |
| N(2)-C(15)-C(16)-C(17)  | -128.6(4) |
| C(21)-C(16)-C(17)-C(18) | -1.5(7)   |
| C(15)-C(16)-C(17)-C(18) | -178.8(4) |
| C(16)-C(17)-C(18)-C(19) | -0.6(7)   |
| C(17)-C(18)-C(19)-C(20) | 2.2(7)    |
| C(18)-C(19)-C(20)-C(21) | -1.7(7)   |
| C(19)-C(20)-C(21)-C(16) | -0.4(7)   |
| C(17)-C(16)-C(21)-C(20) | 1.9(7)    |
| C(15)-C(16)-C(21)-C(20) | 179.3(4)  |
| C(27)-Ir(1)-C(25)-C(26) | -37.8(2)  |
| N(1)-Ir(1)-C(25)-C(26)  | 134.2(2)  |
| C(28)-Ir(1)-C(25)-C(26) | -80.6(3)  |
| C(29)-Ir(1)-C(25)-C(26) | -118.4(4) |
| N(2)-Ir(1)-C(25)-C(26)  | 53.9(3)   |
| Cl(1)-Ir(1)-C(25)-C(26) | -119.7(3) |
| C(27)-Ir(1)-C(25)-C(29) | 80.6(3)   |
| C(26)-Ir(1)-C(25)-C(29) | 118.4(4)  |
| N(1)-Ir(1)-C(25)-C(29)  | -107.4(2) |
| C(28)-Ir(1)-C(25)-C(29) | 37.8(2)   |
| N(2)-Ir(1)-C(25)-C(29)  | 172.2(2)  |
| Cl(1)-Ir(1)-C(25)-C(29) | -1.3(4)   |
| C(27)-Ir(1)-C(25)-C(30) | -159.5(5) |
| C(26)-Ir(1)-C(25)-C(30) | -121.7(5) |
| N(1)-Ir(1)-C(25)-C(30)  | 12.5(4)   |
| C(28)-Ir(1)-C(25)-C(30) | 157.7(5)  |
| C(29)-Ir(1)-C(25)-C(30) | 119.9(5)  |
| N(2)-Ir(1)-C(25)-C(30)  | -67.9(5)  |
| Cl(1)-Ir(1)-C(25)-C(30) | 118.6(4)  |
| C(29)-C(25)-C(26)-C(27) | -0.3(4)   |
| C(30)-C(25)-C(26)-C(27) | -174.8(4) |
| Ir(1)-C(25)-C(26)-C(27) | 60.5(3)   |
| C(29)-C(25)-C(26)-C(31) | 172.0(4)  |
| C(30)-C(25)-C(26)-C(31) | -2.5(7)   |
| Ir(1)-C(25)-C(26)-C(31) | -127.3(4) |
| C(29)-C(25)-C(26)-Ir(1) | -60.7(3)  |
| C(30)-C(25)-C(26)-Ir(1) | 124.8(4)  |
| C(27)-Ir(1)-C(26)-C(25) | 118.1(3)  |
| N(1)-Ir(1)-C(26)-C(25)  | -56.6(3)  |
| C(28)-Ir(1)-C(26)-C(25) | 80.0(3)   |
| C(29)-Ir(1)-C(26)-C(25) | 37.7(2)   |
| N(2)-Ir(1)-C(26)-C(25)  | -143.1(2) |
| Cl(1)-Ir(1)-C(26)-C(25) | 122.1(2)  |
| N(1)-Ir(1)-C(26)-C(27)  | -174.8(2) |

|                         |           |
|-------------------------|-----------|
| C(28)-Ir(1)-C(26)-C(27) | -38.1(2)  |
| C(29)-Ir(1)-C(26)-C(27) | -80.5(3)  |
| C(25)-Ir(1)-C(26)-C(27) | -118.1(3) |
| N(2)-Ir(1)-C(26)-C(27)  | 98.8(2)   |
| Cl(1)-Ir(1)-C(26)-C(27) | 4.0(4)    |
| C(27)-Ir(1)-C(26)-C(31) | -121.4(5) |
| N(1)-Ir(1)-C(26)-C(31)  | 63.9(5)   |
| C(28)-Ir(1)-C(26)-C(31) | -159.5(5) |
| C(29)-Ir(1)-C(26)-C(31) | 158.2(5)  |
| C(25)-Ir(1)-C(26)-C(31) | 120.5(5)  |
| N(2)-Ir(1)-C(26)-C(31)  | -22.6(5)  |
| Cl(1)-Ir(1)-C(26)-C(31) | -117.4(4) |
| C(25)-C(26)-C(27)-C(28) | 1.6(4)    |
| C(31)-C(26)-C(27)-C(28) | -170.5(4) |
| Ir(1)-C(26)-C(27)-C(28) | 62.8(3)   |
| C(25)-C(26)-C(27)-C(32) | 172.2(4)  |
| C(31)-C(26)-C(27)-C(32) | 0.1(7)    |
| Ir(1)-C(26)-C(27)-C(32) | -126.6(4) |
| C(25)-C(26)-C(27)-Ir(1) | -61.2(3)  |
| C(31)-C(26)-C(27)-Ir(1) | 126.6(4)  |
| C(26)-Ir(1)-C(27)-C(28) | -116.5(3) |
| N(1)-Ir(1)-C(27)-C(28)  | -103.3(5) |
| C(29)-Ir(1)-C(27)-C(28) | -36.2(3)  |
| C(25)-Ir(1)-C(27)-C(28) | -79.4(3)  |
| N(2)-Ir(1)-C(27)-C(28)  | 149.3(2)  |
| Cl(1)-Ir(1)-C(27)-C(28) | 65.8(2)   |
| N(1)-Ir(1)-C(27)-C(26)  | 13.2(6)   |
| C(28)-Ir(1)-C(27)-C(26) | 116.5(3)  |
| C(29)-Ir(1)-C(27)-C(26) | 80.4(3)   |
| C(25)-Ir(1)-C(27)-C(26) | 37.2(2)   |
| N(2)-Ir(1)-C(27)-C(26)  | -94.2(2)  |
| Cl(1)-Ir(1)-C(27)-C(26) | -177.6(2) |
| C(26)-Ir(1)-C(27)-C(32) | 123.3(5)  |
| N(1)-Ir(1)-C(27)-C(32)  | 136.5(4)  |
| C(28)-Ir(1)-C(27)-C(32) | -120.2(5) |
| C(29)-Ir(1)-C(27)-C(32) | -156.4(5) |
| C(25)-Ir(1)-C(27)-C(32) | 160.4(5)  |
| N(2)-Ir(1)-C(27)-C(32)  | 29.1(4)   |
| Cl(1)-Ir(1)-C(27)-C(32) | -54.4(4)  |
| C(26)-C(27)-C(28)-C(29) | -2.3(5)   |
| C(32)-C(27)-C(28)-C(29) | -173.2(4) |
| Ir(1)-C(27)-C(28)-C(29) | 60.2(3)   |
| C(26)-C(27)-C(28)-C(33) | 175.4(4)  |
| C(32)-C(27)-C(28)-C(33) | 4.4(7)    |
| Ir(1)-C(27)-C(28)-C(33) | -122.1(4) |
| C(26)-C(27)-C(28)-Ir(1) | -62.6(3)  |
| C(32)-C(27)-C(28)-Ir(1) | 126.5(4)  |
| C(27)-Ir(1)-C(28)-C(29) | -120.0(4) |
| C(26)-Ir(1)-C(28)-C(29) | -81.4(3)  |
| N(1)-Ir(1)-C(28)-C(29)  | 27.8(4)   |
| C(25)-Ir(1)-C(28)-C(29) | -38.6(3)  |
| N(2)-Ir(1)-C(28)-C(29)  | -167.7(3) |
| Cl(1)-Ir(1)-C(28)-C(29) | 121.0(3)  |
| C(26)-Ir(1)-C(28)-C(27) | 38.7(3)   |
| N(1)-Ir(1)-C(28)-C(27)  | 147.8(2)  |
| C(29)-Ir(1)-C(28)-C(27) | 120.0(4)  |
| C(25)-Ir(1)-C(28)-C(27) | 81.4(3)   |
| N(2)-Ir(1)-C(28)-C(27)  | -47.7(4)  |
| Cl(1)-Ir(1)-C(28)-C(27) | -119.0(2) |
| C(27)-Ir(1)-C(28)-C(33) | 120.1(5)  |

|                         |           |
|-------------------------|-----------|
| C(26)-Ir(1)-C(28)-C(33) | 158.7(4)  |
| N(1)-Ir(1)-C(28)-C(33)  | -92.1(4)  |
| C(29)-Ir(1)-C(28)-C(33) | -119.9(5) |
| C(25)-Ir(1)-C(28)-C(33) | -158.5(4) |
| N(2)-Ir(1)-C(28)-C(33)  | 72.4(5)   |
| Cl(1)-Ir(1)-C(28)-C(33) | 1.1(4)    |
| C(27)-C(28)-C(29)-C(25) | 2.1(5)    |
| C(33)-C(28)-C(29)-C(25) | -175.6(4) |
| Ir(1)-C(28)-C(29)-C(25) | 61.8(3)   |
| C(27)-C(28)-C(29)-C(34) | 174.3(4)  |
| C(33)-C(28)-C(29)-C(34) | -3.4(7)   |
| Ir(1)-C(28)-C(29)-C(34) | -126.1(4) |
| C(27)-C(28)-C(29)-Ir(1) | -59.7(3)  |
| C(33)-C(28)-C(29)-Ir(1) | 122.6(4)  |
| C(26)-C(25)-C(29)-C(28) | -1.1(5)   |
| C(30)-C(25)-C(29)-C(28) | 173.5(4)  |
| Ir(1)-C(25)-C(29)-C(28) | -62.0(3)  |
| C(26)-C(25)-C(29)-C(34) | -173.1(4) |
| C(30)-C(25)-C(29)-C(34) | 1.5(7)    |
| Ir(1)-C(25)-C(29)-C(34) | 126.0(4)  |
| C(26)-C(25)-C(29)-Ir(1) | 60.8(3)   |
| C(30)-C(25)-C(29)-Ir(1) | -124.6(4) |
| C(27)-Ir(1)-C(29)-C(28) | 36.5(3)   |
| C(26)-Ir(1)-C(29)-C(28) | 79.7(3)   |
| N(1)-Ir(1)-C(29)-C(28)  | -162.5(2) |
| C(25)-Ir(1)-C(29)-C(28) | 116.8(4)  |
| N(2)-Ir(1)-C(29)-C(28)  | 74.8(11)  |
| Cl(1)-Ir(1)-C(29)-C(28) | -64.0(3)  |
| C(27)-Ir(1)-C(29)-C(25) | -80.3(3)  |
| C(26)-Ir(1)-C(29)-C(25) | -37.1(3)  |
| N(1)-Ir(1)-C(29)-C(25)  | 80.7(3)   |
| C(28)-Ir(1)-C(29)-C(25) | -116.8(4) |
| N(2)-Ir(1)-C(29)-C(25)  | -42.0(11) |
| Cl(1)-Ir(1)-C(29)-C(25) | 179.2(2)  |
| C(27)-Ir(1)-C(29)-C(34) | 157.4(5)  |
| C(26)-Ir(1)-C(29)-C(34) | -159.4(5) |
| N(1)-Ir(1)-C(29)-C(34)  | -41.6(4)  |
| C(28)-Ir(1)-C(29)-C(34) | 120.9(5)  |
| C(25)-Ir(1)-C(29)-C(34) | -122.3(5) |
| N(2)-Ir(1)-C(29)-C(34)  | -164.3(9) |
| Cl(1)-Ir(1)-C(29)-C(34) | 56.9(4)   |

Symmetry transformations used to generate equivalent atoms:

Table 7. Hydrogen bonds for mfmc1 [ $\text{\AA}$  and  $^\circ$ ].

| D-H...A            | d(D-H)   | d(H...A)  | d(D...A) | $\angle(\text{DHA})$ |
|--------------------|----------|-----------|----------|----------------------|
| N(1)-H(1N)...F(3)  | 0.978(5) | 2.093(18) | 3.007(4) | 155(3)               |
| N(2)-H(2N)...Cl(1) | 0.978(5) | 2.30(4)   | 2.936(4) | 122(4)               |

Symmetry transformations used to generate equivalent atoms:
